# Supplementary material
Source: publisher figshare collection journal article supplement (https://asha.figshare.com/articles/dataset/_/14963916)
Supplement: Supplementary file 1 [file 1]

**Supplemental Table 2.** Characteristics of studies with cognitive flexibility tasks.

| Study                | <i>N</i> |     | Age (mos.) |     | Language <i>M</i> ( <i>SD</i> ) <sup>1</sup> |                              | EF task                                                | Verbal loading | Outcome measure                           | Hedges's <i>g</i> ( <i>SE</i> ) | 95% CI      |
|----------------------|----------|-----|------------|-----|----------------------------------------------|------------------------------|--------------------------------------------------------|----------------|-------------------------------------------|---------------------------------|-------------|
|                      | SLI      | TD  | SLI        | TD  | SLI                                          | TD                           |                                                        |                |                                           |                                 |             |
| Switching tasks      |          |     |            |     |                                              |                              |                                                        |                |                                           |                                 |             |
| Beck Mutch, 2001     | 8        | 10  | 105        | 97  | 76<br>(12.57)                                | 108<br>(9.38)                | Trails task                                            | V              | Trails B time                             | 0.10<br>(0.45)                  | −1.22, 1.42 |
| Das & Åystö, 1994    | 60       | 163 | 170        | 146 | 81.4<br>(15.8)                               | —                            | Planned connections                                    | V              | Time to completion                        | 0.19<br>(0.15)                  | −0.57, 0.95 |
| Dibbets et al., 2006 | 4        | 7   | 82         | 82  | 6.5 <sup>2</sup><br>(0.6)                    | 11.57 <sup>2</sup><br>(2.7)  | Switch task                                            | V              | Switch cost in errors                     | 0.40<br>(0.58)                  | −1.10, 1.89 |
|                      |          |     |            |     |                                              |                              | Switch task                                            | V              | Errors at switch                          | −1.02<br>(0.61)                 | −2.56, 0.51 |
|                      |          |     |            |     |                                              |                              | Switch task                                            | V              | Switch cost in RT                         | −0.15<br>(0.57)                 | −1.64, 1.33 |
|                      |          |     |            |     |                                              |                              | Switch task                                            | V              | RT at switch                              | −1.48<br>(0.66)                 | −3.07, 0.10 |
| Farrant et al., 2012 | 30       | 30  | 63         | 63  | —                                            | —                            | DCCS: border version                                   | N              | Level passed                              | −0.71<br>(0.26)                 | −1.72, 0.29 |
| Henry et al., 2012   | 41       | 88  | 138        | 118 | 3.8 <sup>2</sup><br>(2.5)                    | 10.5 <sup>2</sup><br>(1.9)   | Trails task                                            | V              | Switch cost in time                       | 0.11<br>(0.19)                  | −0.74, 0.96 |
|                      |          |     |            |     |                                              |                              | Card sorting task:<br>perceptual rule                  | N              | Correct sorts                             | −0.56<br>(0.19)                 | −1.42, 0.30 |
|                      |          |     |            |     |                                              |                              | CANTAB: card sorting,<br>nonverbal                     | N              | Total errors                              | −0.22<br>(0.19)                 | −1.07, 0.63 |
|                      |          |     |            |     |                                              |                              | Card sorting: verbal rule                              | V              | Correct sorts                             | −0.31<br>(0.19)                 | −1.16, 0.55 |
| Im-Bolter, 2003      | 45       | 45  | 121        | 122 | 5.58 <sup>2</sup><br>(1.94)                  | 10.11 <sup>2</sup><br>(1.65) | Children's Color Trail Test<br>(Llorente et al., 2009) | V              | Time ratio (Trail B: Trail A)             | −0.04<br>(0.21)                 | −0.94, 0.86 |
|                      |          |     |            |     |                                              |                              | Children's Color Trail Test                            | V              | Time difference between<br>conditions     | −0.46<br>(0.21)                 | −1.36, 0.44 |
|                      |          |     |            |     |                                              |                              | Set shifting task:<br>compatible trials                | V              | Switch cost in RT                         | 0.02<br>(0.21)                  | −0.88, 0.91 |
|                      |          |     |            |     |                                              |                              | Set shifting task:<br>incompatible trials              | V              | Switch cost in RT                         | −0.07<br>(0.21)                 | −0.96, 0.83 |
|                      |          |     |            |     |                                              |                              | Set shifting task:<br>compatible trials                | V              | Ratio score (switch:<br>nonswitch trials) | 0.09<br>(0.21)                  | −0.80, 0.99 |
|                      |          |     |            |     |                                              |                              | Set shifting task:<br>incompatible trials              | V              | Ratio score (switch:<br>nonswitch trials) | 0.07<br>(0.21)                  | −0.82, 0.97 |
|                      |          |     |            |     |                                              |                              | Set shifting task:<br>compatible trials                | V              | Switch cost in errors                     | 0<br>(0.21)                     | −0.90, 0.90 |
|                      |          |     |            |     |                                              |                              |                                                        |                |                                           |                                 |             |

| Study                   | <i>N</i> |    | Age (mos.) |     | Language <i>M (SD)</i> <sup>1</sup> |                           | EF task                                | Verbal loading | Outcome measure                      | Hedges's <i>g (SE)</i> | 95% CI      |
|-------------------------|----------|----|------------|-----|-------------------------------------|---------------------------|----------------------------------------|----------------|--------------------------------------|------------------------|-------------|
|                         | SLI      | TD | SLI        | TD  | SLI                                 | TD                        |                                        |                |                                      |                        |             |
|                         |          |    |            |     |                                     |                           | Set shifting task: incompatible trials | V              | Switch cost in errors                | 0.26 (0.21)            | −0.64, 1.16 |
| Kiernan et al., 1997    | 30       | 30 | 56         | 56  | −5.12 <sup>3</sup> (1.81)           | −0.05 <sup>3</sup> (1.22) | Shape sorting task                     | N              | Trials to criterion at shift         | −0.23 (0.26)           | −1.22, 0.76 |
| Victorino, 2011         | 15       | 15 | 128        | 130 | 81.1 (11.6)                         | 112 (8.2)                 | Children's Color Trails Test           | V              | Time to completion (color & numbers) | −0.93 (0.38)           | −2.13, 0.27 |
|                         |          |    |            |     |                                     |                           | Children's Color Trails Test           | V              | Switch cost in time                  | −0.41 (0.36)           | −1.58, 0.76 |
| Williams et al., 2000   | 10       | 10 | 72         | 72  | 9.2 <sup>2</sup> (2.2)              | 12.5 <sup>2</sup> (2.72)  | Card sorting                           | N              | Errors at shift                      | −0.10 (0.43)           | −1.38, 1.19 |
| Yang, 2015              | 19       | 28 | 57         | 57  | 77.09 (8.97)                        | 106.6 (7.03)              | DCCS adapted: linguistic               | V              | % correct after shift                | −0.87 (0.31)           | −1.96, 0.21 |
|                         | 12       | 28 | 57         | 57  | 77.09 (8.97)                        | 106.6 (7.03)              | DCCS adapted: nonlinguistic            | N              | % correct after shift                | −0.95 (0.35)           | −2.12, 0.22 |
| <b>Fluency tasks</b>    |          |    |            |     |                                     |                           |                                        |                |                                      |                        |             |
| Beck Mutch, 2001        | 11       | 12 | 105        | 97  | 76 (12.57)                          | 108 (9.38)                | Phonemic fluency: FAS                  | V              | Correct responses                    | −0.31 (0.40)           | −1.27, 1.21 |
|                         |          |    |            |     |                                     |                           | Verbal fluency: animals                | V              | Correct responses                    | −0.14 (0.40)           | −1.39, 1.10 |
|                         |          |    |            |     |                                     |                           | Verbal fluency: food                   | V              | Correct responses                    | −0.06 (0.40)           | −1.30, 1.18 |
| Bishop & Norbury, 2005a | 17       | 18 | 112        | 103 | 69.67 (11.64)                       | 101.47 (10.01)            | Verbal fluency: uses of objects        | V              | Total responses                      | 0.31 (0.33)            | −0.82, 1.44 |
|                         |          |    |            |     |                                     |                           | Verbal fluency: uses of objects        | V              | Correct responses                    | −0.32 (0.33)           | −1.45, 0.81 |
|                         |          |    |            |     |                                     |                           | Verbal fluency: uses of objects        | V              | Repetitions                          | −0.47 (0.34)           | −1.60, 0.66 |
|                         |          |    |            |     |                                     |                           | Verbal fluency: uses of objects        | V              | Redundant responses                  | −0.29 (0.33)           | −1.42, 0.84 |
|                         |          |    |            |     |                                     |                           | Verbal fluency: uses of objects        | V              | "Not useful" responses               | −0.43 (0.33)           | −1.57, 0.70 |
|                         |          |    |            |     |                                     |                           | Verbal fluency: uses of objects        | V              | Incorrect responses                  | −0.53 (0.34)           | −1.67, 0.61 |
|                         |          |    |            |     |                                     |                           | Verbal fluency: uses of objects        | V              | Unintelligible responses             | 0.08 (0.33)            | −1.04, 1.21 |
|                         |          |    |            |     |                                     |                           | Verbal fluency: uses of objects        | V              | % correct                            | −0.90 (0.35)           | −2.05, 0.26 |
|                         |          |    |            |     |                                     |                           | Verbal fluency: pattern meanings task  | V              | Total responses                      | 0.78 (0.34)            | −0.37, 1.93 |

| Study                         | <i>N</i> |    | Age (mos.) |     | Language <i>M (SD)</i> <sup>1</sup> |                              | EF task                               | Verbal loading | Outcome measure       | Hedges's <i>g</i> ( <i>SE</i> ) | 95% CI      |
|-------------------------------|----------|----|------------|-----|-------------------------------------|------------------------------|---------------------------------------|----------------|-----------------------|---------------------------------|-------------|
|                               | SLI      | TD | SLI        | TD  | SLI                                 | TD                           |                                       |                |                       |                                 |             |
|                               |          |    |            |     |                                     |                              | Verbal fluency: pattern meanings task | V              | Correct responses     | 0.86<br>(0.35)                  | −0.30, 2.01 |
|                               |          |    |            |     |                                     |                              | Verbal fluency: pattern meanings task | V              | Repetitions           | −0.37<br>(0.33)                 | −1.50, 0.77 |
|                               |          |    |            |     |                                     |                              | Verbal fluency: pattern meanings task | V              | Redundant responses   | −0.34<br>(0.33)                 | −1.47, 0.79 |
|                               |          |    |            |     |                                     |                              | Verbal fluency: pattern meanings task | V              | Incorrect responses   | −0.49<br>(0.33)                 | −1.62, 0.63 |
|                               |          |    |            |     |                                     |                              | Verbal fluency: pattern meanings task | V              | Unscoreable responses | −0.51<br>(0.34)                 | −1.65, 0.63 |
|                               |          |    |            |     |                                     |                              | Verbal fluency: pattern meanings task | V              | % correct             | −0.47<br>(0.34)                 | −1.60, 0.67 |
|                               |          |    |            |     |                                     |                              | Verbal fluency: pattern meanings task | V              | % correct             | −0.47<br>(0.34)                 | −1.60, 0.67 |
| Dunn et al., 1996             | 10       | 10 | 75         | 59  | 70.2<br>(26.56)                     | 70.9 <sup>4</sup><br>(24.95) | Semantic fluency                      | V              | Standard score        | −0.02<br>(0.43)                 | −1.30, 1.27 |
|                               |          |    |            |     |                                     |                              | Semantic fluency                      | V              | Correct response      | 0.36<br>(0.43)                  | −0.93, 1.64 |
|                               |          |    |            |     |                                     |                              | Semantic fluency                      | V              | Perseverations        | −0.76<br>(0.45)                 | −2.06, 0.55 |
|                               |          |    |            |     |                                     |                              | Semantic fluency                      | V              | Intrusions            | 0<br>(0.43)                     | −1.28, 1.28 |
|                               |          |    |            |     |                                     |                              | Semantic fluency                      | V              | % correct             | −0.51<br>(0.44)                 | −1.80, 0.79 |
|                               |          |    |            |     |                                     |                              | Semantic fluency                      | V              | % perseverations      | −0.57<br>(0.44)                 | −1.87, 0.72 |
|                               |          |    |            |     |                                     |                              | Semantic fluency                      | V              | % intrusions          | 0.21<br>(0.43)                  | −1.08, 1.49 |
| Hall & Jordan, 1987, Sample A | 19       | 48 | 88         | 73  | —                                   | —                            | Semantic fluency                      | V              | Total responses       | −0.38<br>(0.27)                 | −1.40, 0.64 |
| Hall & Jordan, 1987, Sample B | 25       | 32 | 91         | 87  | —                                   | —                            | Semantic fluency                      | V              | Total responses       | −0.73<br>(0.27)                 | −1.75, 0.30 |
| Hall & Jordan, 1987, Sample C | 23       | 38 | 105        | 99  | —                                   | —                            | Semantic fluency                      | V              | Total responses       | −0.03<br>(0.26)                 | −1.03, 0.97 |
| Hall & Jordan, 1987, Sample D | 23       | 31 | 109        | 110 | —                                   | —                            | Semantic fluency                      | V              | Total responses       | −0.13<br>(0.27)                 | −1.15, 0.89 |
| Hall & Jordan, 1987, Sample E | 11       | 36 | 130        | 122 | —                                   | —                            | Semantic fluency                      | V              | Total responses       | −0.65<br>(0.35)                 | −1.80, 0.51 |
| Hall & Jordan, 1987, Sample F | 8        | 26 | 136        | 131 | —                                   | —                            | Semantic fluency                      | V              | Total responses       | −0.26<br>(0.40)                 | −1.49, 0.98 |

| Study                         | <i>N</i> |    | Age (mos.) |     | Language <i>M (SD)</i> <sup>1</sup> |                           | EF task                             | Verbal loading | Outcome measure           | Hedges's <i>g</i> ( <i>SE</i> ) | 95% CI       |
|-------------------------------|----------|----|------------|-----|-------------------------------------|---------------------------|-------------------------------------|----------------|---------------------------|---------------------------------|--------------|
|                               | SLI      | TD | SLI        | TD  | SLI                                 | TD                        |                                     |                |                           |                                 |              |
| Hall & Jordan, 1987, Sample G | 5        | 28 | 152        | 145 | —                                   | —                         | Semantic fluency                    | V              | Total responses           | 0.58 (0.48)                     | −0.78, 1.93  |
| Hall & Jordan, 1987, Sample H | 3        | 20 | 161        | 160 | —                                   | —                         | Semantic fluency                    | V              | Total responses           | −1.62 (0.64)                    | −3.19, −0.05 |
| Henry et al., 2012            | 41       | 88 | 138        | 118 | 3.8 <sup>2</sup> (2.5)              | 10.5 <sup>2</sup> (1.9)   | Design fluency                      | N              | Mean # unique designs     | −0.14 (0.19)                    | −0.99, 0.71  |
|                               |          |    |            |     |                                     |                           | Verbal fluency: phonemic & semantic | V              | Mean # responses          | −0.99 (0.20)                    | −1.86, −0.12 |
| Lukács et al., 2015           | 31       | 31 | 94         | 94  | 17.9 <sup>5</sup> (9.31)            | 35.35 <sup>5</sup> (6.35) | Verbal fluency                      | V              | Correct responses         | −0.77 (0.26)                    | −1.77, 0.23  |
|                               |          |    |            |     |                                     |                           | Verbal fluency                      | V              | Errors                    | −0.26 (0.25)                    | −1.24, 0.73  |
|                               |          |    |            |     |                                     |                           | Nonverbal fluency                   | N              | Correct responses         | 0.22 (0.25)                     | −0.77, 1.20  |
|                               |          |    |            |     |                                     |                           | Nonverbal fluency                   | N              | Errors                    | 0.26 (0.25)                     | −0.73, 1.24  |
| Marshall et al., 2013         | 10       | 12 | 130        | 130 | 84.23 (19.67)                       | —                         | Verbal fluency                      | V              | Total responses           | −0.39 (0.42)                    | −1.65, 0.88  |
|                               |          |    |            |     |                                     |                           | Verbal fluency                      | V              | Correct responses         | −0.51 (0.42)                    | −1.78, 0.76  |
|                               |          |    |            |     |                                     |                           | Verbal fluency                      | V              | Repeated responses        | 0.37 (0.42)                     | −0.90, 1.63  |
|                               |          |    |            |     |                                     |                           | Verbal fluency                      | V              | Irrelevant responses      | −0.42 (0.42)                    | −1.69, 0.84  |
|                               |          |    |            |     |                                     |                           | Verbal fluency                      | V              | Uninterpretable responses | −0.49 (0.42)                    | −1.76, 0.78  |
|                               |          |    |            |     |                                     |                           | Verbal fluency                      | V              | Responses in 1–15 s       | −1.12 (0.45)                    | −2.42, 0.19  |
|                               |          |    |            |     |                                     |                           | Verbal fluency                      | V              | Responses in 16–30 s      | 0.24 (0.41)                     | −1.02, 1.50  |
|                               |          |    |            |     |                                     |                           | Verbal fluency                      | V              | Responses in 31–45 s      | −0.42 (0.42)                    | −1.69, 0.84  |
|                               |          |    |            |     |                                     |                           | Verbal fluency                      | V              | Responses in 46–60 s      | 0.24 (0.41)                     | −1.02, 1.50  |
|                               |          |    |            |     |                                     |                           | Verbal fluency                      | V              | Clusters                  | −0.15 (0.41)                    | −1.41, 1.11  |
|                               |          |    |            |     |                                     |                           | Verbal fluency                      | V              | Average cluster size      | −0.17 (0.41)                    | −1.43, 1.09  |
|                               |          |    |            |     |                                     |                           | Verbal fluency                      | V              | Switches                  | −0.46 (0.42)                    | −1.72, 0.81  |
| Weckerly et al., 2001         | 24       | 28 | 113        | 114 | —                                   | —                         | Semantic fluency                    | V              | Total responses           | −0.55 (0.28)                    | −1.59, 0.48  |

| Study                  | <i>N</i> |     | Age (mos.) |                  | Language <i>M (SD)</i> <sup>1</sup> |                              | EF task          | Verbal loading | Outcome measure      | Hedges's <i>g (SE)</i> | 95% CI       |
|------------------------|----------|-----|------------|------------------|-------------------------------------|------------------------------|------------------|----------------|----------------------|------------------------|--------------|
|                        | SLI      | TD  | SLI        | TD               | SLI                                 | TD                           |                  |                |                      |                        |              |
|                        |          |     |            |                  |                                     |                              | Semantic fluency | V              | Valid responses      | −0.68<br>(0.28)        | −1.72, 0.36  |
|                        |          |     |            |                  |                                     |                              | Semantic fluency | V              | Errors               | −0.24<br>(0.28)        | −1.27, 0.78  |
|                        |          |     |            |                  |                                     |                              | Semantic fluency | V              | Cluster size         | 0.18<br>(0.28)         | −0.84, 1.21  |
|                        |          |     |            |                  |                                     |                              | Semantic fluency | V              | Switches             | −0.40<br>(0.28)        | −1.43, 0.63  |
|                        |          |     |            |                  |                                     |                              | Phonemic fluency | V              | Total responses      | −0.54<br>(0.28)        | −1.58, 0.49  |
|                        |          |     |            |                  |                                     |                              | Phonemic fluency | V              | Valid responses      | −0.77<br>(0.28)        | −1.82, 0.27  |
|                        |          |     |            |                  |                                     |                              | Phonemic fluency | V              | Errors               | −0.30<br>(0.28)        | −1.33, 0.73  |
|                        |          |     |            |                  |                                     |                              | Phonemic fluency | V              | Cluster size         | 0.25<br>(0.28)         | −0.78, 1.27  |
|                        |          |     |            |                  |                                     |                              | Phonemic fluency | V              | Switches             | −0.55<br>(0.28)        | −1.59, 0.48  |
| Weyandt & Willis, 1994 | 34       | 45  | 103        | 108              | 28.41 <sup>6</sup><br>(8.47)        | 39.15 <sup>6</sup><br>(6.58) | Verbal fluency   | V              | Correct responses    | −0.29<br>(0.23)        | −1.22, 0.65  |
| <b>WCST</b>            |          |     |            |                  |                                     |                              |                  |                |                      |                        |              |
| Cane, 2007             | 29       | 685 | 132        | 144 <sup>7</sup> | —                                   | —                            | WCST             | N              | Perseverations       | −0.80<br>(0.19)        | −1.65, 0.06  |
| Hughes, 2006           | 18       | 18  | 173        | 175              | 71<br>(14.1)                        | —                            | WCST             | N              | Total errors         | −0.90<br>(0.34)        | −2.05, 0.25  |
| Hughes et al., 2009    | 21       | 21  | 168        | 170              | 70<br>(13.1)                        | —                            | WCST             | N              | Total errors         | −0.83<br>(0.32)        | −1.93, 0.27  |
| Liss et al., 2001      | 34       | 80  | 109        | 114 <sup>7</sup> | 97.2<br>(12.8)                      | —                            | WCST             | N              | Perseverative errors | −0.05<br>(0.21)        | −0.84, 0.93  |
| Marton, 2008, Sample B | 25       | 25  | 117        | 118              | 71.57 <sup>8</sup><br>(16.74)       | 92.49 <sup>8</sup><br>(6.78) | WCST             | N              | Total errors         | −1.16<br>(0.30)        | −2.24, −0.09 |
|                        |          |     |            |                  |                                     |                              | WCST             | N              | Perseverative errors | −0.88<br>(0.29)        | −1.94, 0.18  |
|                        |          |     |            |                  |                                     |                              | WCST             | N              | Concept level score  | −1.07<br>(0.30)        | −2.14, 0.00  |
| Weyandt & Willis, 1994 | 34       | 45  | 103        | 108              | 28.41 <sup>6</sup><br>(8.47)        | 39.15 <sup>6</sup><br>(6.58) | WCST             | N              | Errors               | 0.15<br>(0.23)         | −0.78, 1.08  |
|                        |          |     |            |                  |                                     |                              | WCST             | N              | Perseverations       | −0.10<br>(0.23)        | −1.03, 0.83  |

*Note.* SLI = specific language impairment; TD = typically developing; EF = executive function; V = verbal; N = nonverbal; DCCS = Dimensional Change Card Sort (Zelazo, 2006); CANTAB = Cambridge Neuropsychological Test Automated Battery (Robbins et al., 1994); WCST = Wisconsin Card Sorting Test (Heaton, Chelune, Talley, Kay, & Curtis, 1993); — = data not collected.

<sup>1</sup>Standardized around M=100, SD=15 unless otherwise noted. <sup>2</sup>Standardized around M=10, SD=3. <sup>3</sup>Standard deviations below the mean. <sup>4</sup>Groups matched on receptive vocabulary.

<sup>5</sup>Raw score from sentence repetition test. <sup>6</sup>Number of correctly identified pictures. <sup>7</sup>Information about TD group taken from norming study (Paniak et al., 1996). <sup>8</sup>Percent correct.

## References

- Beck Mutch, P. J. (2001). *Comparison of performance on tests of executive functions between children with and without specific language impairments* (Doctoral dissertation). Retrieved from Proquest (3027561).
- Bishop, D. V. M., & Norbury, C. (2005a). Executive functions in children with communication impairments, in relation to autistic symptomatology. I: Generativity. *Autism*, 9, 7–27.
- Cane, D. J. (2007). *Executive function performance and ecological teacher ratings: High-functioning autism and language learning disability profiles and impact on academic achievement* (Doctoral dissertation). Retrieved from Proquest (3252059).
- Das, J. P., & Åystö, S. M. (1994). Cognitive performance of dysphasic students. *European Journal of Psychology of Education*, 9, 27–39. doi:10.1007/BF03172883
- Dibbets, P., Bakker, K., & Jolles, J. (2006). Functional MRI of task switching in children with specific language impairment (SLI). *Neurocase*, 12, 71–79. doi:10.1080/13554790500507032
- Dunn, M., Gomes, H., & Sebastian, M. J. (1996). Prototypicality of responses of autistic, language disordered, and normal children in a word fluency task. *Child Neuropsychology*, 2, 99–108. doi:10.1080/09297049608401355
- Farrant, B. M., Maybery, M. T., & Fletcher, J. (2012). Language, cognitive flexibility, and explicit false belief understanding: Longitudinal analysis in typical development and specific language impairment. *Child Development*, 83, 223–225. doi:10.1111/j.1467-8634.2011.01681.x
- Hall, P. K., & Jordan, L. S. (1987). An assessment of a controlled association task to identify word-finding problems in children. *Language, Speech, and Hearing Services in Schools*, 18, 99–111.
- Heaton, R. K., Chelune, G. J., Talley, J. L., Kay, G. G., & Curtis, G. (1993). *Wisconsin Card Sorting Test Manual—Revised and expanded*. Odessa, FL: Psychological Assessment Resources.
- Henry, L. A., Messer, D. J., & Nash, G. (2012). Executive functioning in children with specific language impairment. *Journal of Child Psychology and Psychiatry*, 53, 37–45. doi:10.1111/j.1469-7610.2011.02430.x
- Hughes, D. M., Turkstra, L., & Wulfeck, B. (2009). Parent and self-ratings of executive function in adolescents with specific language impairment. *International Journal of Language and Communication Disorders*, 44, 901–916.
- Im-Bolter, N. (2003). *Executive processes and mental attention in children with language impairments* (Doctoral dissertation). Retrieved from Proquest (305287968).
- Kiernan, B., Snow, D., Swisher, L., & Vance, R. (1997). Another look at nonverbal rule induction in children with SLI: Testing a flexible reconceptualization hypothesis. *Journal of Speech, Language, and Hearing Research*, 40, 75–82. Retrieved from <http://www.ncbi.nlm.nih.gov/pubmed/9113860>
- Liss, M., Fein, D., Allen, D., Dunn, M., Feinstein, C., Morris, R., . . . Rapin, I. (2001). Executive functioning in high-functioning children with autism. *Journal of Child Psychology and Psychiatry*, 42, 261–270. doi:10.1111/1469-7610.00717
- Llorente, A. M., Voigt, R. G., Williams, J., Frailey, J. K., Satz, P., D’Elia, L. F. (2009). Children's Color Trails Test 1 & 2: Test–retest reliability and factorial validity. *The Clinical Neuropsychologist*, 23, 645–660.
- Lukács, Á., Ladányi, E., Fazekas, K., & Kemény, F. (2015). Executive functions and the contribution of short-term memory span in children with specific language impairment. *Neuropsychology*, 30, 296–303. doi:10.1037/neu0000232
- Marshall, C. R., Rowley, K., Mason, K., Herman, R., & Morgan, G. (2013). Lexical organization in deaf children who use British Sign Language: Evidence from a semantic fluency task. *Journal of Child Language*, 40, 1–28. doi:10.1017/S0305000912000116
- Marton, K. (2008). Visuo-spatial processing and executive functions in children with specific language impairment. *International Journal of Language and Communication Disorders*, 43, 181–200. doi:10.1080/16066350701340719

- Robbins, T. W., James, M., Owen, A. M., Sahakian, B. J., McInnes, L., & Rabbitt, P. (1994). Cambridge Neuropsychological Test Automated Battery (CANTAB): A factor analytic study of a large sample of normal elderly volunteers. *Dementia and Geriatric Cognitive Disorders*, 5(5), 266–281.
- Victorino, K. R. (2011). *Auditory selective attention and language processing in children with and without specific language impairment* (Doctoral dissertation). Retrieved from Proquest (3478801).
- Weckerly, J., Wulfeck, B., & Reilly, J. (2001). Verbal fluency deficits in children with specific language impairment: Slow rapid naming or slow to name? *Child Neuropsychology*, 7, 142–152.
- Weyandt, L. L., & Willis, W. G. (1994). Executive functions in school-aged children: Potential efficacy of tasks in discriminating clinical groups. *Developmental Neuropsychology*, 10, 27–38.
- Williams, D., Stott, C. M., Goodyer, I. M., & Sahakian, B. J. (2000). Specific language impairment with or without hyperactivity: Neuropsychological evidence for frontostriatal dysfunction. *Developmental Medicine and Child Neurology*, 42, 368–375.
- Yang, H.-C. (2015). *Executive function in preschoolers with primary language impairment* (Doctoral dissertation). Retrieved from Proquest (3718816).
- Zelazo, P. D. (2006). The Dimensional Change Card Sort (DCCS): A method of assessing executive function in children. *Nature Protocols*, 1, 297–301.
