# Supplementary material
Source: publisher figshare collection journal article supplement (https://asha.figshare.com/articles/dataset/_/14963916)
Supplement: Supplementary file 2 [file 1]

**Supplemental Table 1.** Characteristics of studies including inhibitory control tasks.

| Study                     | <i>N</i> |     | Age (mos.) |     | Language <i>M</i> ( <i>SD</i> ) <sup>1</sup> |                   | EF tasks                             | Verbal loading | Outcome measure                        | Hedges's <i>g</i> ( <i>SE</i> ) | 95% CI       |
|---------------------------|----------|-----|------------|-----|----------------------------------------------|-------------------|--------------------------------------|----------------|----------------------------------------|---------------------------------|--------------|
|                           | SLI      | TD  | SLI        | TD  | SLI                                          | TD                |                                      |                |                                        |                                 |              |
| Response inhibition tasks |          |     |            |     |                                              |                   |                                      |                |                                        |                                 |              |
| Beck Mutch, 2001          | 11       | 12  | 105        | 97  | 76<br>(12.57)                                | 108<br>(9.38)     | Stroop (color/word)                  | V              | Items completed in 45 s                | −0.32<br>(0.41)                 | −1.57, 0.93  |
| Bishop & Norbury, 2005b   | 17       | 18  | 112        | 103 | 69.67<br>(11.64)                             | 101.47<br>(10.01) | TEA-Ch: Opposite Worlds              | V              | Time to completion: Opposite condition | −1.11<br>(0.36)                 | −2.27, 0.06  |
|                           |          |     |            |     |                                              |                   | TEA-Ch: Opposite Worlds              | V              | Time difference between conditions     | −0.76<br>(0.34)                 | −1.90, 0.39  |
|                           |          |     |            |     |                                              |                   | TEA-Ch: Walk/Don't Walk              | N              | # correct trials                       | −1.30<br>(0.37)                 | −2.50, −0.11 |
| Das & Åystö, 1994         | 60       | 163 | 170        | 146 | 81.4<br>(15.8)                               | —                 | Stroop (color/word)                  | V              | Time to completion                     | −0.38<br>(0.15)                 | −1.14, 0.39  |
|                           |          |     |            |     |                                              |                   | Auditory selective attention (A)     | N              | Items correct subtract items incorrect | −0.58<br>(0.15)                 | −1.34, 0.19  |
|                           |          |     |            |     |                                              |                   | Auditory selective attention (B)     | N              | Items correct subtract items incorrect | −0.89<br>(0.16)                 | −1.67, −0.12 |
| Dodwell & Bavin, 2008     | 16       | 25  | 79         | 79  | 77.25<br>(3.79)                              | 96.76<br>(9.55)   | Go/No-go variation                   | V              | Omission & commission errors           | −0.32<br>(0.32)                 | −1.42, 0.78  |
|                           |          |     |            |     |                                              |                   | Auditory continuous performance test | V              | Total errors                           | −0.68<br>(0.32)                 | −1.79, 0.43  |
| Epstein et al., 2014      | 12       | 22  | 139        | 133 | 76.5<br>(9.21)                               | 111<br>(7.16)     | Go/No-go (80/20)                     | V              | Hit rate                               | −0.45<br>(0.36)                 | −1.62, 0.72  |
|                           |          |     |            |     |                                              |                   | Go/No-go (80/20)                     | V              | RT                                     | −0.25<br>(0.35)                 | −1.41, 0.92  |
|                           |          |     |            |     |                                              |                   | Go/No-go (80/20)                     | V              | False alarms                           | 0.02<br>(0.35)                  | −1.14, 1.18  |
|                           |          |     |            |     |                                              |                   | Go/No-go (50/50)                     | V              | Hit rate                               | −0.22<br>(0.35)                 | −1.38, 0.94  |
|                           |          |     |            |     |                                              |                   | Go/No-go (50/50)                     | V              | RT                                     | −0.22<br>(0.35)                 | −1.38, 0.95  |
|                           |          |     |            |     |                                              |                   | Go/No-go (50/50)                     | V              | False alarms                           | 0.60<br>(0.36)                  | −0.57, 1.77  |
|                           |          |     |            |     |                                              |                   | Go/No-go (20/80)                     | V              | Hit rate                               | −0.25<br>(0.35)                 | −1.42, 0.91  |
|                           |          |     |            |     |                                              |                   | Go/No-go (20/80)                     | V              | RT                                     | −0.12<br>(0.35)                 | −1.29, 1.04  |
|                           |          |     |            |     |                                              |                   | Go/No-go (20/80)                     | V              | False alarms                           | 0.22<br>(0.35)                  | −0.94, 1.38  |

| Study                     | <i>N</i> |    | Age (mos.) |     | Language <i>M (SD)</i> <sup>1</sup> |                              | EF tasks                                             | Verbal loading | Outcome measure                        | Hedges's <i>g (SE)</i> | 95% CI       |
|---------------------------|----------|----|------------|-----|-------------------------------------|------------------------------|------------------------------------------------------|----------------|----------------------------------------|------------------------|--------------|
|                           | SLI      | TD | SLI        | TD  | SLI                                 | TD                           |                                                      |                |                                        |                        |              |
| Finneran et al., 2009     | 13       | 13 | 62         | 63  | 2nd <sup>2</sup>                    | 64th <sup>2</sup>            | Go/No-go (40/60)                                     | N              | Accuracy ( <i>d'</i> )                 | -1.03<br>(0.41)        | -2.28, 0.22  |
|                           |          |    |            |     |                                     |                              | Go/No-go (40/60)                                     | N              | False alarms                           | -0.78<br>(0.40)        | -2.06, 0.45  |
|                           |          |    |            |     |                                     |                              | Go/No-go (40/60)                                     | N              | Hit rate                               | -1.00<br>(0.40)        | -2.25, 0.25  |
| Hanson & Montgomery, 2002 | 12       | 12 | 192        | 192 | 68<br>(6)                           | 107<br>(9.6)                 | Auditory continuous performance task                 | V              | Hits                                   | -0.25<br>(0.40)        | -1.49, 0.98  |
|                           |          |    |            |     |                                     |                              | Auditory continuous performance task                 | V              | False alarms                           | -0.38<br>(0.40)        | -1.62, 0.86  |
| Henry et al., 2012        | 41       | 88 | 138        | 118 | 3.8 <sup>3</sup><br>(2.5)           | 10.5 <sup>3</sup> (1.9)      | Motor inhibition                                     | N              | Total errors                           | -0.90<br>(0.20)        | -1.76, -0.03 |
|                           |          |    |            |     |                                     |                              | Verbal inhibition                                    | V              | Total errors                           | -0.39<br>(0.19)        | -1.24, 0.47  |
| Im-Bolter, 2003           | 45       | 45 | 121        | 122 | 5.58 <sup>3</sup><br>(1.94)         | 10.11 <sup>3</sup><br>(1.65) | Stroop (color/word)                                  | V              | Time difference between conditions     | -0.54<br>(0.21)        | -1.44, 0.37  |
|                           |          |    |            |     |                                     |                              | Stroop (color/word)                                  | V              | Time ratio (Stroop: neutral condition) | -0.19<br>(0.21)        | -1.09, 0.71  |
|                           |          |    |            |     |                                     |                              | Antisaccade                                          | N              | Proportion correct                     | -0.68<br>(0.22)        | -1.59, 0.23  |
|                           |          |    |            |     |                                     |                              | Antisaccade                                          | N              | Latency                                | -0.15<br>(0.21)        | -1.05, 0.75  |
| Kuntz, 2012               | 16       | 16 | 97         | 97  | 8.37 <sup>3</sup><br>(2.68)         | 11.75 <sup>3</sup><br>(1.77) | Auditory Stroop task: neutral, linguistic target     | V              | Proportion of errors                   | -0.84<br>(0.36)        | -2.02, 0.33  |
|                           |          |    |            |     |                                     |                              | Auditory Stroop task: congruent, linguistic target   | V              | Proportion of errors                   | -0.65<br>(0.35)        | -1.81, 0.52  |
|                           |          |    |            |     |                                     |                              | Auditory Stroop task: incongruent, linguistic target | V              | Proportion of errors                   | -0.72<br>(0.36)        | -1.89, 0.45  |
|                           |          |    |            |     |                                     |                              | Auditory Stroop task: neutral, perceptual target     | N              | Proportion of errors                   | -0.45<br>(0.35)        | -1.61, 0.71  |
|                           |          |    |            |     |                                     |                              | Auditory Stroop task: congruent, perceptual target   | N              | Proportion of errors                   | -0.80<br>(0.36)        | -1.98, 0.37  |
|                           |          |    |            |     |                                     |                              | Auditory Stroop task: incongruent, perceptual target | N              | Proportion of errors                   | -1.02<br>(0.37)        | -2.21, 0.17  |
|                           |          |    |            |     |                                     |                              | Visual Stroop task: neutral, linguistic target       | V              | Proportion of errors                   | -0.41<br>(0.35)        | -1.57, 0.75  |
|                           |          |    |            |     |                                     |                              | Visual Stroop task: congruent, linguistic target     | V              | Proportion of errors                   | -0.42<br>(0.35)        | -1.57, 0.74  |

| Study               | <i>N</i> |    | Age (mos.) |    | Language <i>M (SD)</i> <sup>1</sup> |                              | EF tasks                                             | Verbal loading | Outcome measure                        | Hedges's <i>g (SE)</i> | 95% CI       |
|---------------------|----------|----|------------|----|-------------------------------------|------------------------------|------------------------------------------------------|----------------|----------------------------------------|------------------------|--------------|
|                     | SLI      | TD | SLI        | TD | SLI                                 | TD                           |                                                      |                |                                        |                        |              |
|                     |          |    |            |    |                                     |                              | Visual Stroop task: incongruent, linguistic target   | V              | Proportion of errors                   | −0.64<br>(0.35)        | −1.81, 0.52  |
|                     |          |    |            |    |                                     |                              | Visual Stroop task: neutral, perceptual target       | N              | Proportion of errors                   | −0.79<br>(0.36)        | −1.97, 0.38  |
|                     |          |    |            |    |                                     |                              | Visual Stroop task: congruent, perceptual target     | N              | Proportion of errors                   | −0.77<br>(0.36)        | −1.94, 0.40  |
|                     |          |    |            |    |                                     |                              | Visual Stroop task: incongruent, perceptual target   | N              | Proportion of errors                   | −0.77<br>(0.36)        | −1.94, 0.41  |
|                     |          |    |            |    |                                     |                              | Auditory Stroop task: neutral, linguistic target     | V              | RT                                     | −0.52<br>(0.35)        | −1.68, 0.64  |
|                     |          |    |            |    |                                     |                              | Auditory Stroop task: congruent, linguistic target   | V              | RT                                     | −0.54<br>(0.35)        | −1.70, 0.62  |
|                     |          |    |            |    |                                     |                              | Auditory Stroop task: incongruent, linguistic target | V              | RT                                     | −0.59<br>(0.35)        | −1.75, 0.58  |
|                     |          |    |            |    |                                     |                              | Auditory Stroop task: neutral, perceptual target     | N              | RT                                     | −1.13<br>(0.37)        | −2.33, 0.06  |
|                     |          |    |            |    |                                     |                              | Auditory Stroop task: congruent, perceptual target   | N              | RT                                     | −0.94<br>(0.36)        | −2.13, 0.24  |
|                     |          |    |            |    |                                     |                              | Auditory Stroop task: incongruent, perceptual target | N              | RT                                     | −0.98<br>(0.37)        | −2.16, 0.21  |
|                     |          |    |            |    |                                     |                              | Visual Stroop task: neutral, linguistic target       | V              | RT                                     | −1.30<br>(0.38)        | −2.51, −0.09 |
|                     |          |    |            |    |                                     |                              | Visual Stroop task: congruent, linguistic target     | V              | RT                                     | −1.15<br>(0.37)        | −2.34, 0.05  |
|                     |          |    |            |    |                                     |                              | Visual Stroop task: incongruent, linguistic target   | V              | RT                                     | −1.18<br>(0.38)        | −2.38, 0.02  |
|                     |          |    |            |    |                                     |                              | Visual Stroop task: neutral, perceptual target       | N              | RT                                     | −0.70<br>(0.36)        | −1.86, 0.47  |
|                     |          |    |            |    |                                     |                              | Visual Stroop task: congruent, perceptual target     | N              | RT                                     | −1.07<br>(0.37)        | −2.26, 0.12  |
|                     |          |    |            |    |                                     |                              | Visual Stroop task: incongruent, perceptual target   | N              | RT                                     | −1.36<br>(0.38)        | −2.58, −0.15 |
| Lukács et al., 2015 | 31       | 31 | 94         | 94 | 17.9 <sup>4</sup><br>(9.31)         | 35.35 <sup>4</sup><br>(6.35) | Verbal Stroop task                                   | V              | Accuracy difference between conditions | 0.25<br>(0.25)         | −0.74, 1.23  |
|                     |          |    |            |    |                                     |                              | Verbal Stroop task                                   | V              | RT difference between conditions       | 0.05<br>(0.25)         | −0.93, 1.04  |
|                     |          |    |            |    |                                     |                              | Nonverbal Stroop task                                | N              | Accuracy difference between conditions | 0.171<br>(0.25)        | −0.81, 1.15  |

| Study               | <i>N</i> |    | Age (mos.) |     | Language <i>M (SD)</i> <sup>1</sup> |               | EF tasks                    | Verbal loading | Outcome measure                  | Hedges's <i>g (SE)</i> | 95% CI         |
|---------------------|----------|----|------------|-----|-------------------------------------|---------------|-----------------------------|----------------|----------------------------------|------------------------|----------------|
|                     | SLI      | TD | SLI        | TD  | SLI                                 | TD            |                             |                |                                  |                        |                |
|                     |          |    |            |     |                                     |               | Nonverbal Stroop task       | N              | RT difference between conditions | 0.22 (0.25)            | -0.76, 1.21    |
| Marton et al., 2012 | 22       | 22 | 148        | 150 | 81.6 (13.8)                         | 119.4 (9.5)   | Stop signal task            | N              | Stop signal RT                   | -0.45 (0.30)           | -1.52, 0.63    |
| Oram Cardy, 2003    | 13       | 14 | 115        | 115 | 75 (8)                              | 106 (13)      | Stop signal task            | N              | % invalid trials                 | -0.93 (0.39)           | -2.16, 0.30    |
|                     |          |    |            |     |                                     |               | Stop signal task            | N              | Go signal % errors               | -0.77 (0.39)           | -1.99, 0.45    |
|                     |          |    |            |     |                                     |               | Stop signal task            | N              | Go signal RT                     | -0.37 (0.38)           | -1.57, 0.83    |
|                     |          |    |            |     |                                     |               | Stop signal task            | N              | Stop signal % inhibitions        | 0 (0.37)               | -1.20, 1.20    |
|                     |          |    |            |     |                                     |               | Stop signal task            | N              | Stop signal RT                   | -0.97 (0.40)           | -2.20, 0.27    |
| Spaulding, 2008     | 31       | 31 | 56         | 56  | 43.51 (14.34)                       | 101.7 (14.31) | Go/No-go with distractor    | V              | Accuracy                         | -1.23 (0.27)           | -2.26, -0.20   |
|                     |          |    |            |     |                                     |               | Go/No-go with distractor    | V              | RT                               | -1.09 (0.27)           | -2.11, -0.07   |
|                     |          |    |            |     |                                     |               | Stop signal task            | V              | Go trials % correct              | -0.92 (0.26)           | -1.92, 0.09    |
|                     |          |    |            |     |                                     |               | Stop signal task            | V              | Stop trials % correct            | -1.17 (0.27)           | -2.19, -0.15   |
| Spaulding, 2010     | 22       | 16 | 55         | 56  | 69.59 (10.63)                       | 106.14 (9.08) | Stop signal task            | V              | Accuracy                         | -1.28 (0.33)           | -2.40, -0.16   |
| Tropper, 2009       | 12       | 22 | 139        | 134 | 76.5 (9.21)                         | 111 (7.16)    | Linguistic go/no-go (80/20) | V              | Hit rate                         | -38.08* (4.63)         | -42.30, -33.86 |
|                     |          |    |            |     |                                     |               | Linguistic go/no-go (80/20) | V              | RT                               | -0.25 (0.35)           | -1.41, 0.92    |
|                     |          |    |            |     |                                     |               | Linguistic go/no-go (80/20) | V              | False alarm rate                 | 2.38 (0.45)            | 1.06, 3.70     |
|                     |          |    |            |     |                                     |               | Linguistic go/no-go (50/50) | V              | Hit rate                         | -19.18 (2.35)          | -22.19, -16.18 |
|                     |          |    |            |     |                                     |               | Linguistic go/no-go (50/50) | V              | RT                               | -0.22 (0.35)           | -1.38, 0.95    |
|                     |          |    |            |     |                                     |               | Linguistic go/no-go (50/50) | V              | False alarm rate                 | 68.35* (8.30)          | 62.70, 73.99   |
|                     |          |    |            |     |                                     |               | Linguistic go/no-go (20/80) | V              | Hit rate                         | -30.25* (3.69)         | -34.01, -26.49 |

| Study                                              | <i>N</i> |    | Age (mos.) |    | Language <i>M (SD)</i> <sup>1</sup> |                 | EF tasks                       | Verbal loading | Outcome measure                           | Hedges's <i>g (SE)</i> | 95% CI         |
|----------------------------------------------------|----------|----|------------|----|-------------------------------------|-----------------|--------------------------------|----------------|-------------------------------------------|------------------------|----------------|
|                                                    | SLI      | TD | SLI        | TD | SLI                                 | TD              |                                |                |                                           |                        |                |
|                                                    |          |    |            |    |                                     |                 | Linguistic go/no-go (20/80)    | V              | RT                                        | -0.12<br>(0.35)        | -1.29, 1.04    |
|                                                    |          |    |            |    |                                     |                 | Linguistic go/no-go (20/80)    | V              | False alarm rate                          | 9.76<br>(1.23)         | 7.59, 11.94    |
|                                                    |          |    |            |    |                                     |                 | Nonlinguistic go/no-go (80/20) | N              | Hit rate                                  | -20.55<br>(2.52)       | -23.66, -12.44 |
|                                                    |          |    |            |    |                                     |                 | Nonlinguistic go/no-go (80/20) | N              | RT                                        | -0.21<br>(0.35)        | -1.37, 0.95    |
|                                                    |          |    |            |    |                                     |                 | Nonlinguistic go/no-go (80/20) | N              | False alarm rate                          | 4.11<br>(0.61)         | 2.58, 5.64     |
|                                                    |          |    |            |    |                                     |                 | Nonlinguistic go/no-go (50/50) | N              | Hit rate                                  | -23.43*<br>(2.86)      | -26.75, -20.12 |
|                                                    |          |    |            |    |                                     |                 | Nonlinguistic go/no-go (50/50) | N              | RT                                        | -0.37<br>(0.35)        | -1.54, 0.79    |
|                                                    |          |    |            |    |                                     |                 | Nonlinguistic go/no-go (50/50) | N              | False alarm rate                          | 17.21<br>(2.12)        | 14.36, 20.06   |
|                                                    |          |    |            |    |                                     |                 | Nonlinguistic go/no-go (20/80) | N              | Hit rate                                  | -57.24*<br>(6.95)      | -62.41, -52.07 |
|                                                    |          |    |            |    |                                     |                 | Nonlinguistic go/no-go (20/80) | N              | RT                                        | -0.64<br>(0.36)        | -1.81, 0.53    |
|                                                    |          |    |            |    |                                     |                 | Nonlinguistic go/no-go (20/80) | N              | False alarm rate                          | -21.48<br>(2.63)       | -24.66, -18.30 |
| <b>Resistance to distractor interference tasks</b> |          |    |            |    |                                     |                 |                                |                |                                           |                        |                |
| Arbel & Donchin, 2014                              | 10       | 10 | 99         | 99 | 72.4<br>(11.01)                     | 112<br>(7.97)   | Flanker task                   | N              | Errors on incompatible trials             | -0.66<br>(0.44)        | -1.97, 0.64    |
|                                                    |          |    |            |    |                                     |                 | Flanker task                   | N              | RT on incompatible trials                 | -0.29<br>(0.43)        | -1.57, 1.00    |
|                                                    |          |    |            |    |                                     |                 | Flanker task                   | N              | RT on correct trials                      | -0.21<br>(0.43)        | -1.49, 1.08    |
|                                                    |          |    |            |    |                                     |                 | Flanker task                   | N              | RT on incorrect trials                    | -0.44<br>(0.43)        | -1.73, 0.85    |
|                                                    |          |    |            |    |                                     |                 | Flanker task                   | N              | Error rate                                | -0.64<br>(0.44)        | -1.93, 0.67    |
|                                                    |          |    |            |    |                                     |                 | Flanker task with feedback     | N              | RT on correct trials                      | -0.39<br>0.43          | -1.68, 0.90    |
|                                                    |          |    |            |    |                                     |                 | Flanker task with feedback     | N              | RT on incorrect trials                    | -0.26<br>(0.43)        | -1.54, 1.03    |
|                                                    |          |    |            |    |                                     |                 | Flanker task with feedback     | N              | Error rate                                | -0.62<br>(0.44)        | -1.92, 0.68    |
| Arbel, 2006                                        | 10       | 10 | 99         | 99 | 72.4<br>(11.02)                     | 112.9<br>(7.98) | Flanker task                   | N              | RT on correct trials after correct trials | -0.07<br>(0.43)        | -1.35, 1.22    |

| Study                  | <i>N</i> |     | <i>Age (mos.)</i> |     | <i>Language M (SD)<sup>1</sup></i> |                | EF tasks                                        | Verbal loading | Outcome measure                             | Hedges's <i>g</i> ( <i>SE</i> ) | 95% CI       |
|------------------------|----------|-----|-------------------|-----|------------------------------------|----------------|-------------------------------------------------|----------------|---------------------------------------------|---------------------------------|--------------|
|                        | SLI      | TD  | SLI               | TD  | SLI                                | TD             |                                                 |                |                                             |                                 |              |
| Beck Mutch, 2001       | 11       | 12  | 105               | 97  | 76<br>(12.57)                      | 108<br>(9.38)  | Flanker task                                    | N              | RT on correct trials after incorrect trials | -0.06<br>(0.43)                 | -1.35, 1.22  |
|                        |          |     |                   |     |                                    |                | Alphabet visual search                          | V              | Time to completion                          | 0.51<br>(0.41)                  | -0.75, 1.76  |
|                        |          |     |                   |     |                                    |                | Alphabet visual search                          | V              | Errors                                      | -0.44<br>(0.41)                 | -1.69, 0.81  |
|                        |          |     |                   |     |                                    |                | Circles & sticks visual search: parallel search | N              | Time to completion                          | 0.52<br>(0.41)                  | -0.74, 1.77  |
|                        |          |     |                   |     |                                    |                | Circles & sticks visual search: serial search   | N              | Errors                                      | -0.61<br>(0.41)                 | -1.87, 0.65  |
|                        |          |     |                   |     |                                    |                | Circles & sticks visual search: parallel search | N              | Time to completion                          | -0.07<br>(0.40)                 | -1.31, 1.17  |
|                        |          |     |                   |     |                                    |                | Circles & sticks visual search: serial search   | N              | Errors                                      | -0.35<br>(0.41)                 | -1.59, 0.91  |
|                        |          |     |                   |     |                                    |                | Visual matching                                 | N              | Total responses                             | 0<br>(0.40)                     | -1.24, 1.24  |
|                        |          |     |                   |     |                                    |                | Cross out visual search                         | N              | Total responses                             | 0.39<br>(0.41)                  | -0.86, 1.63  |
| Das & Åystö, 1994      | 60       | 163 | 170               | 146 | 81.4<br>(15.8)                     | —              | Visual search (C)                               | N              | Time to completion                          | -0.05<br>(0.15)                 | -0.81, 0.71  |
|                        |          |     |                   |     |                                    |                | Visual search (A)                               | N              | Time to completion                          | 0.26<br>(0.15)                  | -0.50, 1.02  |
| Dispaldro et al., 2013 | 22       | 22  | 75                | 74  | —                                  | —              | Visual attention                                | N              | Accuracy                                    | -0.38<br>(0.30)                 | -1.45, 0.69  |
|                        |          |     |                   |     |                                    |                | Visual attention: masked                        | N              | Accuracy                                    | 0.20<br>(0.30)                  | -0.87, 1.26  |
|                        |          |     |                   |     |                                    |                | Visual attention: masked 140 ms                 | N              | Accuracy                                    | -0.67<br>(0.30)                 | -1.75, 0.42  |
|                        |          |     |                   |     |                                    |                | Visual attention: masked 260 ms                 | N              | Accuracy                                    | -0.43<br>(0.30)                 | -1.50, 0.64  |
|                        |          |     |                   |     |                                    |                | Visual attention: masked 380 ms                 | N              | Accuracy                                    | -0.14<br>(0.30)                 | -1.21, 0.93  |
|                        |          |     |                   |     |                                    |                | Visual attention: masked 1100 ms                | N              | Accuracy                                    | -0.13<br>(0.30)                 | -1.20, 0.93  |
| Eichorn et al., 2014   | 22       | 22  | 148               | 150 | 81.6<br>(13.8)                     | 119.4<br>(9.5) | Distractor task                                 | V              | Accuracy                                    | -0.56<br>(0.30)                 | -1.63, 0.52  |
|                        |          |     |                   |     |                                    |                | Distractor task                                 | V              | RT                                          | -0.96<br>(0.31)                 | -2.06, 0.13  |
|                        |          |     |                   |     |                                    |                | Distractor task: verbal cuing                   | V              | Accuracy                                    | -1.13<br>(0.32)                 | -2.24, -0.02 |

| Study                   | <i>N</i> |    | Age (mos.) |     | Language <i>M (SD)</i> <sup>1</sup> |                               | EF tasks                                           | Verbal loading | Outcome measure         | Hedges's <i>g (SE)</i> | 95% CI       |
|-------------------------|----------|----|------------|-----|-------------------------------------|-------------------------------|----------------------------------------------------|----------------|-------------------------|------------------------|--------------|
|                         | SLI      | TD | SLI        | TD  | SLI                                 | TD                            |                                                    |                |                         |                        |              |
|                         |          |    |            |     |                                     |                               | Distractor task: verbal cuing                      | V              | RT                      | −1.10<br>(0.32)        | −2.20, 0.01  |
| Marton, 2008, Sample A  | 40       | 40 | 76         | 76  | 66.63 <sup>5</sup><br>(24.37)       | 87.82 <sup>5</sup><br>(18.15) | Position in space                                  | N              | Trials correct          | −0.48<br>(0.23)        | −1.41, 0.45  |
| Marton, 2008, Sample A1 | 21       | 40 | 77         | 76  | —                                   | 87.82 <sup>5</sup><br>(18.15) | Position in space                                  | N              | Trials correct          | 0.01<br>(0.27)         | −1.00, 1.02  |
| Marton et al., 2007     | 15       | 15 | 107        | 106 | 72.53<br>(9.26)                     | 25.71 <sup>6</sup><br>(5.59)  | Listening span                                     | V              | Immediate errors        | −1.47<br>(0.40)        | −2.71, −0.22 |
|                         |          |    |            |     |                                     |                               | Listening span                                     | V              | Delayed errors          | −0.72<br>(0.37)        | −1.91, 0.46  |
|                         |          |    |            |     |                                     |                               | Listening span                                     | V              | Contextual distractions | −0.97<br>(0.38)        | −2.18, 0.23  |
|                         |          |    |            |     |                                     |                               | Listening span                                     | V              | Perseverations          | −0.81<br>(0.37)        | −2.00, 0.39  |
| Marton et al., 2012     | 22       | 22 | 148        | 150 | 81.6<br>(13.8)                      | 119.4<br>(9.5)                | Delayed match to sample: simultaneous presentation | N              | Latency                 | −0.97<br>(0.31)        | −0.97, 0.12  |
|                         |          |    |            |     |                                     |                               | Delayed match to sample: delayed presentation      | N              | Accuracy                | 0.35<br>(0.30)         | −0.72, 1.42  |
| Miller et al., 2006     | 20       | 15 | 167        | 167 | 5 <sup>3</sup><br>(2)               | 9 <sup>3</sup><br>(2)         | Visual search: First position                      | N              | RT                      | −0.74<br>(0.35)        | −1.89, 0.42  |
|                         |          |    |            |     |                                     |                               | Visual search: Second position                     | N              | RT                      | −0.88<br>(0.35)        | −2.03, 0.28  |
|                         |          |    |            |     |                                     |                               | Visual search: Third position                      | N              | RT                      | −0.74<br>(0.35)        | −1.89, 0.42  |
|                         |          |    |            |     |                                     |                               | Visual search: Fourth position                     | N              | RT                      | −1.04<br>(0.36)        | −2.21, 0.13  |
|                         |          |    |            |     |                                     |                               | Visual search: Fifth position                      | N              | RT                      | −1.31<br>(0.37)        | −2.50, −0.12 |
|                         |          |    |            |     |                                     |                               | Visual search: Target absent                       | N              | RT                      | −0.90<br>(0.35)        | −2.06, 0.26  |
|                         |          |    |            |     |                                     |                               | Visual search: First position                      | N              | % correct               | 0.16<br>(0.33)         | −0.98, 1.29  |
|                         |          |    |            |     |                                     |                               | Visual search: Second position                     | N              | % correct               | −0.16<br>(0.33)        | −1.29, 0.98  |
|                         |          |    |            |     |                                     |                               | Visual search: Third position                      | N              | % correct               | 0.22<br>(0.34)         | −0.91, 1.35  |
|                         |          |    |            |     |                                     |                               | Visual search: Fourth position                     | N              | % correct               | 0.36<br>(0.34)         | −0.78, 1.49  |
|                         |          |    |            |     |                                     |                               | Visual search: Fifth position                      | N              | % correct               | 0.53<br>(0.34)         | −0.62, 1.66  |

| Study                         | <i>N</i> |    | Age (mos.) |     | Language <i>M (SD)</i> <sup>1</sup> |             | EF tasks                                     | Verbal loading | Outcome measure  | Hedges's <i>g (SE)</i> | 95% CI       |
|-------------------------------|----------|----|------------|-----|-------------------------------------|-------------|----------------------------------------------|----------------|------------------|------------------------|--------------|
|                               | SLI      | TD | SLI        | TD  | SLI                                 | TD          |                                              |                |                  |                        |              |
| Oram Cardy, 2003              | 14       | 14 | 115        | 115 | 75<br>(8)                           | 106<br>(13) | Visual search: Target absent                 | N              | % correct        | 0.15<br>(0.33)         | −0.92, 1.28  |
|                               |          |    |            |     |                                     |             | Visual search                                | N              | Average RT       | −1.23<br>(0.40)        | −2.47, 0.01  |
|                               |          |    |            |     |                                     |             | Visual search: First position                | N              | RT               | −1.41<br>(0.41)        | −2.67, −0.15 |
|                               |          |    |            |     |                                     |             | Visual search: Second position               | N              | RT               | −0.98<br>(0.39)        | −2.20, 0.24  |
|                               |          |    |            |     |                                     |             | Visual search: Third position                | N              | RT               | −1.08<br>(0.39)        | −2.31, 0.15  |
|                               |          |    |            |     |                                     |             | Visual search: Fourth position               | N              | RT               | −1.13<br>(0.40)        | −2.37, 0.10  |
|                               |          |    |            |     |                                     |             | Visual search: Fifth position                | N              | RT               | −0.69<br>(0.38)        | −1.90, 0.51  |
|                               |          |    |            |     |                                     |             | Visual search: Target absent                 | N              | RT               | −0.69<br>(0.38)        | −1.90, 0.52  |
| Oram Cardy et al., 2010       | 14       | 28 | 115        | 116 | 75<br>(8)                           | 105<br>(13) | Visual search                                | N              | % invalid trials | 0.30<br>(0.32)         | −0.82, 1.41  |
|                               |          |    |            |     |                                     |             | Visual search                                | N              | % errors         | 0<br>(0.32)            | −1.11, 1.11  |
|                               |          |    |            |     |                                     |             | Visual search                                | N              | RT               | −0.71<br>(0.33)        | −1.83, 0.42  |
| Park et al., 2015, Sample A   | 42       | 89 | 108        | 108 | —                                   | —           | Visual search                                | N              | RT               | −0.50<br>(0.19)        | −1.35, 0.36  |
| Park et al., 2015, Sample B   | 42       | 89 | 164        | 164 | —                                   | —           | Visual search                                | N              | RT               | −0.81<br>(0.19)        | −1.67, 0.05  |
| Seiger-Gardner & Brooks, 2008 | 18       | 18 | 103        | 112 | 73<br>(12)                          | 109<br>(11) | Naming with distractors A: early, neutral    | V              | RT               | −0.78<br>(0.34)        | −1.92, 0.36  |
|                               |          |    |            |     |                                     |             | Naming with distractors A: early, neutral    | V              | Errors           | −0.83<br>(0.34)        | −1.98, 0.31  |
|                               |          |    |            |     |                                     |             | Naming with distractors A: early, same onset | V              | RT               | −0.98<br>(0.35)        | −2.13, 0.17  |
|                               |          |    |            |     |                                     |             | Naming with distractors A: early, same onset | V              | Errors           | −0.56<br>(0.33)        | −1.69, 0.57  |
|                               |          |    |            |     |                                     |             | Naming with distractors A: early, unrelated  | V              | RT               | −0.67<br>(0.34)        | −1.80, 0.47  |
|                               |          |    |            |     |                                     |             | Naming with distractors A: early, unrelated  | V              | Errors           | −0.56<br>(0.33)        | −1.69, 0.57  |



| Study | <i>N</i> |    | Age (mos.) |    | Language <i>M (SD)</i> <sup>1</sup> |    | EF tasks                                           | Verbal loading | Outcome measure | Hedges's <i>g (SE)</i> | 95% CI      |
|-------|----------|----|------------|----|-------------------------------------|----|----------------------------------------------------|----------------|-----------------|------------------------|-------------|
|       | SLI      | TD | SLI        | TD | SLI                                 | TD |                                                    |                |                 |                        |             |
|       |          |    |            |    |                                     |    | Naming with distractors A: synchronous, neutral    | V              | RT              | -0.60 (0.33)           | -1.74, 0.53 |
|       |          |    |            |    |                                     |    | Naming with distractors A: synchronous, neutral    | V              | Errors          | -1.08 (0.35)           | -2.24, 0.08 |
|       |          |    |            |    |                                     |    | Naming with distractors A: synchronous, same onset | V              | RT              | -0.96 (0.35)           | -2.11, 0.19 |
|       |          |    |            |    |                                     |    | Naming with distractors A: synchronous, same onset | V              | Errors          | -0.54 (0.33)           | -1.66, 0.59 |
|       |          |    |            |    |                                     |    | Naming with distractors A: synchronous, unrelated  | V              | RT              | -0.37 (0.33)           | -1.50, 0.75 |
|       |          |    |            |    |                                     |    | Naming with distractors A: synchronous, unrelated  | V              | Errors          | -0.66 (0.34)           | -1.80, 0.47 |
|       |          |    |            |    |                                     |    | Naming with distractors A: late, neutral           | V              | RT              | -0.99 (0.35)           | -2.15, 0.16 |
|       |          |    |            |    |                                     |    | Naming with distractors A: late, neutral           | V              | Errors          | -0.22 (0.33)           | -1.34, 0.90 |
|       |          |    |            |    |                                     |    | Naming with distractors A: late, same onset        | V              | RT              | -0.77 (0.34)           | -1.91, 0.37 |
|       |          |    |            |    |                                     |    | Naming with distractors A: late, same onset        | V              | Errors          | -0.75 (0.34)           | -1.88, 0.39 |
|       |          |    |            |    |                                     |    | Naming with distractors A: late, unrelated         | V              | RT              | -0.75 (0.34)           | -1.89, 0.39 |
|       |          |    |            |    |                                     |    | Naming with distractors A: late, unrelated         | V              | Errors          | -0.78 (0.34)           | -1.92, 0.36 |
|       |          |    |            |    |                                     |    | Naming with distractors B: early, neutral          | V              | RT              | -0.90 (0.34)           | -2.04, 0.25 |
|       |          |    |            |    |                                     |    | Naming with distractors B: early, neutral          | V              | Errors          | -0.21 (0.33)           | -1.33, 0.91 |
|       |          |    |            |    |                                     |    | Naming with distractors B: early, rhyme            | V              | RT              | -0.93 (0.34)           | -2.07, 0.22 |
|       |          |    |            |    |                                     |    | Naming with distractors B: early, rhyme            | V              | Errors          | -0.14 (0.33)           | -1.26, 0.99 |
|       |          |    |            |    |                                     |    | Naming with distractors B: early, unrelated        | V              | RT              | -0.91 (0.34)           | -2.06, 0.24 |
|       |          |    |            |    |                                     |    | Naming with distractors B: early, unrelated        | V              | Errors          | -0.59 (0.33)           | -1.73, 0.54 |
|       |          |    |            |    |                                     |    | Naming with distractors B: synchronous, neutral    | V              | RT              | -0.15 (0.33)           | -1.27, 0.97 |
|       |          |    |            |    |                                     |    | Naming with distractors B: synchronous, neutral    | V              | Errors          | -0.54 (0.33)           | -1.67, 0.59 |

| Study                           | <i>N</i> |    | Age (mos.) |     | Language <i>M (SD)</i> <sup>1</sup> |              | EF tasks                                          | Verbal loading | Outcome measure | Hedges's <i>g (SE)</i> | 95% CI       |
|---------------------------------|----------|----|------------|-----|-------------------------------------|--------------|---------------------------------------------------|----------------|-----------------|------------------------|--------------|
|                                 | SLI      | TD | SLI        | TD  | SLI                                 | TD           |                                                   |                |                 |                        |              |
|                                 |          |    |            |     |                                     |              | Naming with distractors B: synchronous, rhyme     | V              | RT              | -0.43 (0.33)           | -1.56, 0.70  |
|                                 |          |    |            |     |                                     |              | Naming with distractors B: synchronous, rhyme     | V              | Errors          | -0.62 (0.33)           | -1.76, 0.51  |
|                                 |          |    |            |     |                                     |              | Naming with distractors B: synchronous, unrelated | V              | RT              | -0.50 (0.33)           | -1.63, 0.63  |
|                                 |          |    |            |     |                                     |              | Naming with distractors B: synchronous, unrelated | V              | Errors          | -0.11 (0.33)           | -1.22, 1.01  |
|                                 |          |    |            |     |                                     |              | Naming with distractors B: late, neutral          | V              | RT              | -0.71 (0.34)           | -1.85, 0.43  |
|                                 |          |    |            |     |                                     |              | Naming with distractors B: late, neutral          | V              | Errors          | -0.36 (0.33)           | -1.48, 0.77  |
|                                 |          |    |            |     |                                     |              | Naming with distractors B: late, rhyme            | V              | RT              | -0.75 (0.34)           | -1.89, 0.39  |
|                                 |          |    |            |     |                                     |              | Naming with distractors B: late, rhyme            | V              | Errors          | -0.72 (0.34)           | -1.85, 0.42  |
|                                 |          |    |            |     |                                     |              | Naming with distractors B: late, unrelated        | V              | RT              | -0.70 (0.34)           | -1.84, 0.44  |
|                                 |          |    |            |     |                                     |              | Naming with distractors B: late, unrelated        | V              | Errors          | -0.49 (0.33)           | -1.62, 0.64  |
| Seiger-Gardner & Schwartz, 2008 | 20       | 20 | 109        | 111 | 75 (12)                             | 107 (8)      | <sup>7</sup> PWI: SA -150ms, phonological         | V              | RT              | -0.34 (0.31)           | -1.43, 0.76  |
|                                 |          |    |            |     |                                     |              | PWI: SA -150ms, semantic                          | V              | RT              | -0.27 (0.31)           | -1.36, 0.83  |
|                                 |          |    |            |     |                                     |              | PWI: SA -0, phonological                          | V              | RT              | -0.31 (0.31)           | -1.41, 0.78  |
|                                 |          |    |            |     |                                     |              | PWI: SA -0, semantic                              | V              | RT              | -0.30 (0.31)           | -1.39, 0.80  |
|                                 |          |    |            |     |                                     |              | PWI: SA +150 ms, phonological                     | V              | RT              | -0.46 (0.31)           | -1.56, 0.64  |
|                                 |          |    |            |     |                                     |              | PWI: SA +150 ms, semantic                         | V              | RT              | -0.49 (0.32)           | -1.59, 0.61  |
|                                 |          |    |            |     |                                     |              | PWI: SA +300 ms, phonological                     | V              | RT              | -0.86 (0.32)           | -1.97, 0.26  |
|                                 |          |    |            |     |                                     |              | PWI: SA +300 ms, semantic                         | V              | RT              | -0.87 (0.33)           | -1.99, 0.25  |
|                                 |          |    |            |     |                                     |              | PWI: SA +500 ms, phonological                     | V              | RT              | -0.44 (0.31)           | -1.54, 0.66  |
|                                 |          |    |            |     |                                     |              | PWI: SA +500 ms, semantic                         | V              | RT              | -0.49 (0.32)           | -1.59, 0.61  |
| Spaulding, 2010                 | 22       | 22 | 55         | 56  | 69.59 (10.63)                       | 106.1 (9.08) | Distractor interference: linguistic               | V              | Accuracy        | -1.24 (0.32)           | -2.35, -0.12 |

[illegible]

| Study                  | N   |    | Age (mos.) |     | Language M (SD) <sup>1</sup> |                    | EF tasks                              | Verbal loading | Outcome measure        | Hedges's g (SE) | 95% CI       |
|------------------------|-----|----|------------|-----|------------------------------|--------------------|---------------------------------------|----------------|------------------------|-----------------|--------------|
|                        | SLI | TD | SLI        | TD  | SLI                          | TD                 |                                       |                |                        |                 |              |
| Lorsbach et al., 1996  | 21  | 20 | 12         | 127 | 82.7                         | —                  | Sentence cloze task with interference | V              | Suppression score      | −0.61 (0.31)    | −1.71, 0.49  |
| Norbury, 2005          | 19  | 28 | 15         | 150 | 4.45 <sup>3</sup>            | 9.82 <sup>3</sup>  | Suppression task: dominant meaning    | V              | Accuracy               | −1.05 (0.31)    | −2.14, 0.05  |
|                        |     |    |            |     |                              |                    | Suppression task: subordinate meaning | V              | Accuracy               | −0.94 (0.31)    | −2.03, 0.15  |
|                        |     |    |            |     |                              |                    | Suppression task: total interference  | V              | Accuracy               | −0.90 (0.31)    | −1.98, 0.19  |
|                        |     |    |            |     |                              |                    | Suppression task: dominant meaning    | V              | RT                     | −0.06 (0.29)    | −1.12, 1.00  |
|                        |     |    |            |     |                              |                    | Suppression task: subordinate meaning | V              | RT                     | −0.27 (0.29)    | −1.33, 0.80  |
|                        |     |    |            |     |                              |                    | Suppression task: total interference  | V              | RT                     | −0.06 (0.29)    | −1.12, 1.00  |
|                        |     |    |            |     |                              |                    |                                       |                |                        |                 |              |
| Tower tasks            |     |    |            |     |                              |                    |                                       |                |                        |                 |              |
| Lidstone et al., 2012  | 21  | 21 | 11         | 112 | 65                           | 95                 | Tower of London                       | N              | % problems correct     | −0.80 (0.32)    | −1.90, 0.30  |
|                        |     |    |            |     |                              |                    | Tower of London                       | N              | RT                     | 0.23 (0.30)     | −0.85, 1.31  |
| Marton, 2008, Sample B | 25  | 25 | 11         | 118 | 71.57 <sup>5</sup>           | 92.49 <sup>5</sup> | Tower of London                       | N              | Accuracy (total score) | −0.62 (0.29)    | −1.67, 0.43  |
|                        |     |    |            |     |                              |                    | Tower of London                       | N              | Total moves            | 0.1 (0.28)      | −0.93, 1.13  |
|                        |     |    |            |     |                              |                    | Tower of London                       | N              | Total time             | −0.36 (0.28)    | −1.40, 0.68  |
|                        |     |    |            |     |                              |                    | Tower of London                       | N              | Initiation time        | −2.68 (0.39)    | −3.90, −1.46 |
|                        |     |    |            |     |                              |                    | Tower of London                       | N              | Execution time         | −0.43 (0.28)    | −1.47, 0.61  |
|                        |     |    |            |     |                              |                    | Tower of London                       | N              | Time violation         | 0.01 (0.28)     | −1.02, 1.04  |
|                        |     |    |            |     |                              |                    | Tower of London                       | N              | Rule violation         | −1.46 (0.31)    | −2.56, −0.36 |
| Weyandt & Willis, 1994 | 34  | 45 | 10         | 108 | 28.41 <sup>8</sup>           | 39.15 <sup>8</sup> | Tower of Hanoi                        | N              | Total points           | −0.54 (0.23)    | −1.48, 0.40  |

*Note.* SLI = specific language impairment; TD = typically developing; EF = executive function; V = verbal; N = nonverbal; TEA-Ch = Test of Everyday Attention for Children (Manly, 1998); RT = reaction time; — = data not collected.

\*Outlier (>3 *SD* from the mean effect size).

<sup>1</sup>Standardized around *M* = 100, *SD* = 15, unless otherwise noted. <sup>2</sup>Percentile rank. <sup>3</sup>Standardized around *M* = 10, *SD* = 3. <sup>4</sup>Raw score from sentence repetition test. <sup>5</sup>Percent correct.

<sup>6</sup>Groups assessed with differing language measures. <sup>7</sup>PWI = Picture-Word Interference paradigm; SA = stimulus asynchrony. <sup>8</sup>Number of correctly identified pictures.

## References

- Arbel, Y. (2006). *Error processing by individuals with specific language impairment: An ERP study* (Doctoral dissertation). Retrieved from ProQuest (3224349).
- Arbel, Y., & Donchin, E. (2014). Error and performance feedback processing by children with specific language impairment—An ERP study. *Biological Psychology*, 99, 83–91. doi:10.1016/j.biopsycho.2014.02.012
- Beck Mutch, P. J. (2001). *Comparison of performance on tests of executive functions between children with and without specific language impairments* (Doctoral dissertation). Retrieved from Proquest (3027561).
- Bishop, D. V. M., & Norbury, C. (2005b). Executive functions in children with communication impairments, in relation to autistic symptomatology. II: Response inhibition. *Autism*, 9, 29–43.
- Das, J. P., & Åystö, S. M. (1994). Cognitive performance of dysphasic students. *European Journal of Psychology of Education*, 9, 27–39. doi:10.1007/BF03172883
- Dispaldro, M., Leonard, L. B., Corradi, N., Ruffino, M., Bronte, T., & Facchetti, A. (2013). Visual attentional engagement deficits in children with specific language impairment and their role in real-time language processing. *Cortex*, 49, 2126–2139.
- Dodwell, K., & Bavin, E. L. (2008). Children with specific language impairment: An investigation of their narratives and memory. *International Journal of Language and Communication Disorders*, 43, 201–218. doi:10.1080/13682820701366147
- Eichorn, N., Marton, K., Campanelli, L., & Scheuer, J. (2014). Verbal strategies and nonverbal cues in school-age children with and without specific language impairment (SLI). *International Journal of Language and Communication Disorders*, 49, 618–630.
- Epstein, B., Shafer, V. L., Melara, R. D., & Schwartz, R. G. (2014). Can children with SLI detect cognitive conflict? Behavioral and electrophysiological evidence. *Journal of Speech, Language and Hearing Research*, 57, 1463–1467. doi:10.1044/2014\_JSLHR-L-13-0234
- Finneran, D. A., Francis, A. L., & Leonard, L. B. (2009). Sustained attention in children with specific language impairment (SLI). *Journal of Speech, Language, and Hearing Research*, 52, 915–929.
- Hanson, R. A., & Montgomery, J. W. (2002). Effects of general processing capacity and sustained selective attention on temporal processing performance of children with specific language impairment. *Applied Psycholinguistics*, 23, 75–93. doi:10.1017/S0142716402000048
- Henry, L. A., Messer, D. J., & Nash, G. (2012). Executive functioning in children with specific language impairment. *Journal of Child Psychology and Psychiatry*, 53, 37–45. doi:10.1111/j.1469-7610.2011.02430.x
- Im-Bolter, N. (2003). *Executive processes and mental attention in children with language impairments* (Doctoral dissertation). Retrieved from Proquest (305287968).
- Kuntz, B. P. (2012). *Selective attention in children with specific language impairment: Auditory and visual Stroop effects* (Doctoral dissertation). Retrieved from Proquest (3508697).
- Lidstone, J. S. M., Meins, E., & Fernyhough, C. (2012). Verbal mediation of cognition in children with specific language impairment. *Development and Psychopathology*, 24, 651–660. doi:10.1017/S0954579412000223
- Lorsbach, T. C., Wilson, S., & Reimer, J. F. (1996). Memory for relevant and irrelevant information: Evidence for deficient inhibitory processes in language/learning disabled children. *Contemporary Educational Psychology*, 21, 447–466.
- Lukács, Á., Ladányi, E., Fazekas, K., & Kemény, F. (2015). Executive functions and the contribution of short-term memory span in children with specific language impairment. *Neuropsychology*, 30, 296–303. doi:10.1037/neu0000232
- Manly, T. (1998). *The Test of Everyday Attention for Children* (TEA-Ch). San Antonio, TX: Pearson.
- Marton, K. (2008). Visuo-spatial processing and executive functions in children with specific language impairment. *International Journal of Language and Communication Disorders*, 43, 181–200. doi:10.1080/16066350701340719
- Marton, K., Campanelli, L., Scheuer, J., Yoon, J., & Eichorn, N. (2012). Executive function profiles in children with and without specific language impairment. *Journal of Applied Psycholinguistics*, 12, 57–73.
- Marton, K., Kelmenson, L., & Pinkhasova, M. (2007). Inhibition control and working memory capacity in children with SLI. *Psychologia*, 50, 110–121.
- Miller, C. A., Leonard, L. B., Kail, R. V., Zhang, X., Tomblin, J. B., & Francis, D. J. (2006). Response time in 14-year-olds with language impairment. *Journal of Speech, Language, and Hearing Research*, 49, 712–728.
- Norbury, C. F. (2005). Barking up the wrong tree? Lexical ambiguity resolution in children with language impairments and autistic spectrum disorders. *Journal of Experimental Child Psychology*, 90, 142–171. doi:10.1016/j.jecp.2004.11.003
- Oram Cardy, J. E. (2003). *Seeking cognitive markers of specific language impairment and attention-deficit/hyperactivity disorder* (Doctoral dissertation). Retrieved from Proquest (305256355).

- Oram Cardy, J. E., Tannock, R., Johnson, A. M., & Johnson, C. J. (2010). The contribution of processing impairments to SLI: Insights from attention-deficit/hyperactivity disorder. *Journal of Communication Disorders*, 43, 77–91. doi:10.1016/j.jcomdis.2009.09.003
- Park, J., Mainela-Arnold, E., & Miller, C. A. (2015). Information processing speed as a predictor of IQ in children with and without specific language impairment in grades 3 and 8. *Journal of Communication Disorders*, 53, 57–69.
- Seiger-Gardner, L., & Brooks, P. J. (2008). Effects of onset- and rhyme-related distractors on phonological processing in children with specific language impairment. *Journal of Speech, Language, and Hearing Research*, 51, 1263–1281.
- Seiger-Gardner, L., & Schwartz, R. G. (2008). Lexical access in children with and without specific language impairment: A cross-modal picture-word interference study. *International Journal of Language and Communication Disorders*, 43, 528–551. doi:10.1080/13682820701768581
- Spaulding, T. J. (2008). *Attentional control in preschool children with specific language impairment* (Doctoral dissertation). Retrieved from Proquest (3297961).
- Spaulding, T. J. (2010). Investigating mechanisms of suppression in preschool children with specific language impairment. *Journal of Speech, Language, and Hearing Research*, 53, 725–738. doi:10.1044/1092-4388(2009/09-0041)
- Tropper, B. (2009). *An electrophysiological and behavioral examination of cognitive control in children with specific language impairment* (Doctoral dissertation). Retrieved from Proquest (3378653).
- Victorino, K. R. (2011). *Auditory selective attention and language processing in children with and without specific language impairment* (Doctoral dissertation). Retrieved from Proquest (3478801).
- Weyandt, L. L., & Willis, W. G. (1994). Executive functions in school-aged children: Potential efficacy of tasks in discriminating clinical groups. *Developmental Neuropsychology*, 10, 27–38.
- Williams, D., Stott, C. M., Goodyer, I. M., & Sahakian, B. J. (2000). Specific language impairment with or without hyperactivity: Neuropsychological evidence for frontostriatal dysfunction. *Developmental Medicine and Child Neurology*, 42, 368–375.
- Yang, H.-C. (2015). *Executive function in preschoolers with primary language impairment* (Doctoral dissertation). Retrieved from Proquest (3718816).
